# Supplementary material
Source: PubMed Central journal article supplement (PMC4299145)
Supplement: supp_142.1.207_DEV113043supp.pdf [file supp_142.1.207_DEV113043supp.pdf]

## Supplementary material

### Time-course quantitative RT-PCR (qPCR) analysis

Primers used: *PmBlimp1*: F: 5'-CCAAACACGACGAAGCACTA-3', R: 5'-GGCGTTGAGGACAGGTTTAG-3'; *PmBra*: F: 5'-CGAGATGATCGTCACCAAGA-3', R: 5'-GGGGTGAAGTCCAGAAGGAT-3'; *PmDelta*: F: 5'-CGAAGGCTTCACGTGCTACTG-3', R: 5'-GCGCATGCGTAGCCATTCTC-3'; *PmErg*: F: 5'-AAGATGACCGACCCGGACGA-3', R: 5'-TGCCGTGGACCTTGGTCATA-3'; *PmEts1*: F: 5'-ATGCCTGTCTACGCGAGAGT-3', R: 5'-TCCAGGCTGAACTCCTTGAT-3'; *PmFoxa*: F: 5'-TGGCGCATATAATCCTCACC-3', R: 5'-GTCTCTCAGTGGCGCAAGAT-3'; *PmFoxg*: F: 5'-CAACGCTGCAGGTACAACCTT-3', R: 5'-AAGAGGCGATCCATGGAGAA-3'; *PmFoxn2/3*: F: 5'-TGAATGATCAGAGCCTGCCAAGA-3', R: 5'-TCTCGCTGGGCTTTGAGGAT-3'; *PmGata1/2/3*: F: 5'-GAGCCCACAGGCATTACAGA-3', R: 5'-CAACGGGCACTACCTGTGTA-3'; *PmGata4/5/6*: F: 5'-CGAGGTCTCTCCACTTGCAT-3', R: 5'-GACGGTTGGGAGTTTTTCAGA-3'; *PmHesc*: 5'-CCAGCAGCCAATCCTCCATC-3', R: 5'-TCCGAGGTGACATGGGTGAA-3'; *PmHex*: F: 5'-GGCCGTTGCATAAGCGGAAAG-3', R: 5'-TGCAGGAGTTTCGCCAGCTT-3'; *PmOtxα*: F: 5'-AGGCCGGCATGTACTCTATG-3', R: 5'-GGTTCTCTCCCGTCTGGTTT-3'; *PmOtxβb*: F: 5'-GAAAGGATGGATTGCGTCAT-3', R: 5'-ACCACTCATACTGCGGATTG-3'; *PmTbr*: 5'-CGACCGAAGACACAAGACAA-3', R: 5'-CAGGCTTTGGGTGCTGTAAT-3'; *PmTgif*: F: 5'-TGACCCTTCTGCAGGTCTGT-3', R: 5'-TCCCAGGAGACCGTCTACTG-3'; *PmWnt3*: 5'-CTGATCTACTACGACCCGTCACC, R: 5'-CTGGCACCCATCTATGGCGT; *PmWnt4*: F: 5'-TAGAGCAGGGTCCTACGGGAC-3', R: 5'-CTGCTCCGTGACCTCTGACA-3'; *PmWnt8*: F: 5'-GGG CAG AAA CCC AGA ACG AC-3'; R: 5'-TAC AGC TCC GTG CTT CCC AC-3'; *PmWnt16*: F: 5'-GGTCTCCGAACACTACTGCGTACG-3', R: 5'-TTGTATCCCCTCCCGCAGCA-3'; *PmLamin2breceptor*: F: 5'-GAGCATGCCTAAGCCAGACC-3', R: 5'-CTCCACCATGGGCTCCAGTA-3'.

### Perturbation of gene expression

MASOs used: *PmEts1*: 5'-TCGAGCCCGTTGTGATACATTGTGG-3'; *PmFoxA*: 5'-CATGGGTTTCCCTCGACTCGTTGGG-3'; *PmGata4/5/6*: 5'-CTCCTAGAATCAAGTGGGTTGCAG-3'; *PmHex*: 5'-TGACATGGTGACACGAAATACGGTC-3'.

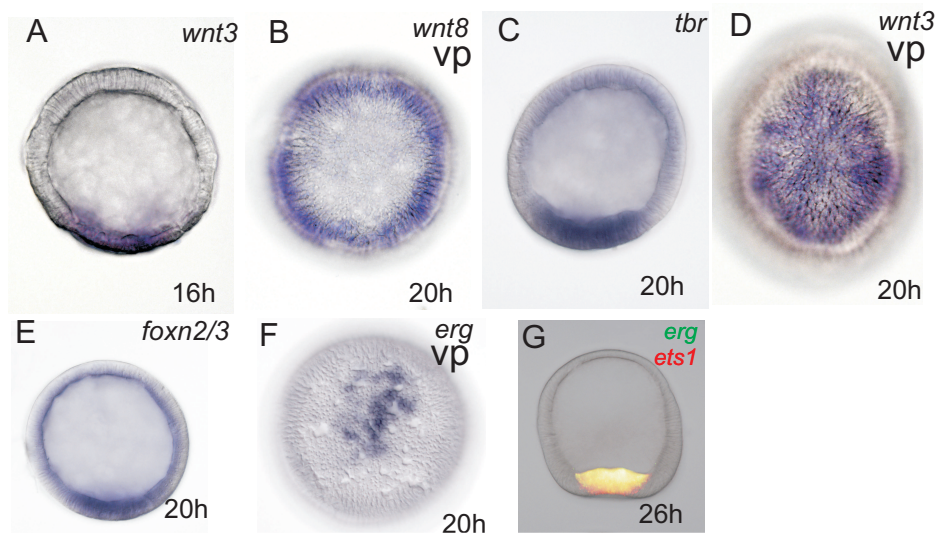

**Figure S1. Characterization of additional gene expression patterns in early through late blastulae**

(A-G) Whole mount *in situ* hybridization (WMISH) of the indicated genes in early (16h), mid (20h) and late blastulae (26h). Embryos are shown in a lateral view with vegetal towards the bottom unless indicated as vp for vegetal pole view. (G) Two color fluorescent *in situ* hybridization (FISH) of the indicated genes.

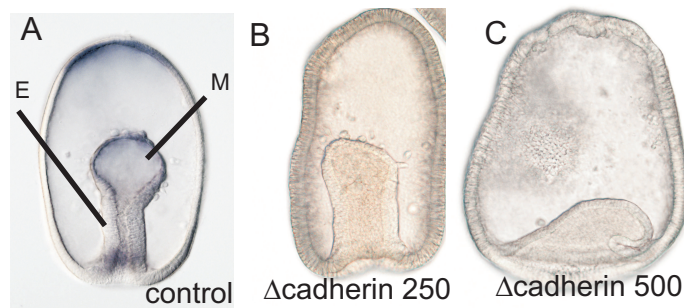

**Figure S2. Phenotype of 2 day embryos injected with various concentrations of  $\Delta$ -cadherin at one cell stage**

(A) Control showing normal gastrulation and formation of endoderm (E) and mesodermal bulb (M). (B) Embryo injected with 250ng/ $\mu$ l (low)  $\Delta$ -cadherin showing a reduction in the size of the mesodermal bulb but extended endodermal archenteron. (C) Embryo injected with 500ng/ $\mu$ l (medium)  $\Delta$ -cadherin showing reduction of the entire archenteron. All embryos are shown in a lateral view.

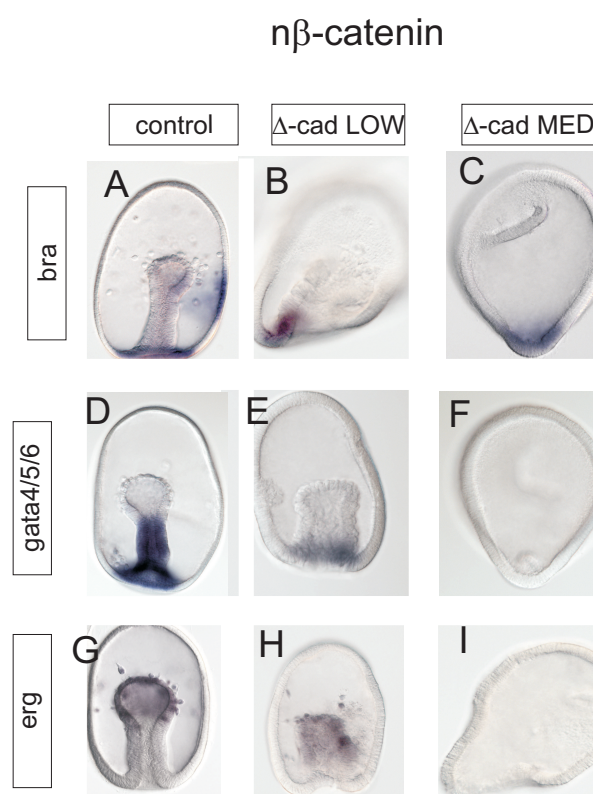

**Figure S3. Gene expression in 2 day embryos injected with various concentrations of  $\Delta$ -cadherin at one cell stage determined using whole mount in situ hybridization**  
WMISH of *bra* expression (A-C), *gata4/5/6* expression (D-F) and *erg* expression (G-I) in control embryos or embryos expressing low or medium doses of  $\Delta$ -cadherin as indicated. Concentration of  $\Delta$ -cadherin injected was determined as in Figure S2. Embryos are shown in the lateral view with vegetal towards the bottom.

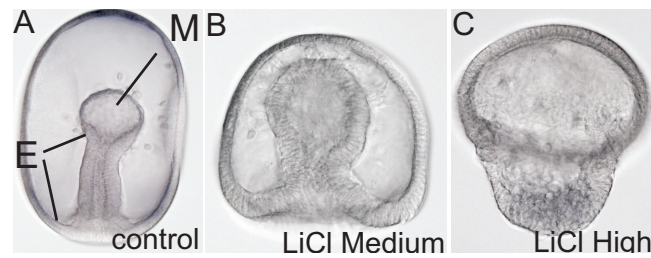

**Figure S4. Phenotype of 2 day embryos treated within medium and high doses of LiCl from two cell stage**

(A) Control embryo showing normal gastrulation and formation of endoderm (E) and mesodermal bulb (M). (B) Embryo treated with 30mM LiCl showing expansion of archenteron and a greatly reduced ectoderm. (C) Embryo bathed in 50mM LiCl. These embryos are unable to gastrulate and frequently form exogastrulae, a phenotype classically associated with expanded endoderm and mesoderm territories, as shown here. Embryos are shown in the lateral view with vegetal towards the bottom.

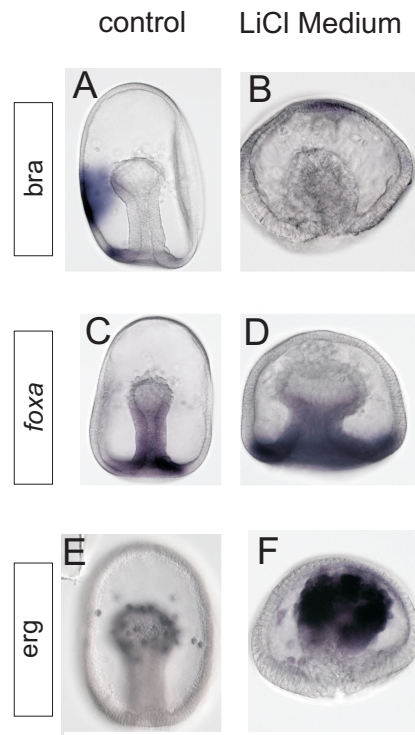

**Figure S5. Gene expression in 2 day embryos treated within medium doses of LiCl from two cell stage**

WMISH of *bra* (A, B), *foxa* (C, D) and *erg* (E, F) expression in gastrulae. (A, C, E) are control embryos and (B, D, F) depict embryos treated with a medium dose of LiCl. Expression in embryos treated with a high  $\text{Li}^+$  dose was not examined as these embryos fail to gastrulate. Embryos are shown in the lateral view with vegetal towards the bottom.
